# Supplementary material for: Household transmission of SARS-CoV-2 during the Omicron wave in Shanghai, China:a case-ascertained study
Source: medRxiv preprint, doi:10.1101/2022.09.26.22280362, version 1 (2022-09-27)
Supplement: Supplementary Materials [file 280362_file02.docx]

Supplementary Materials

for

Household transmission of SARS-CoV-2 during the Omicron wave in Shanghai, China：a case-ascertained study

Zhongqiu Wei1,a, Zhonglin Wang1,a, Wenjie Ma1,a, Jingjing Li1, Xiaoming Fu1, Hailing Chang1, Yue Qiu1, He Tian1, Yanling Ge1, Yanfeng Zhu1, Aimei Xia1, Qianhu Wu2, Gongbao Liu3, Xiaowen Zhai4, Xiaobo Zhang5, Yan Wang2,b Mei Zeng1,6,b

1Department of Infectious Disease, Children’s Hospital of Fudan University, Shanghai, China

2School of Public Health, Fudan University, Key Laboratory of Public Health Safety, Ministry of Education, Shanghai, China

3Department of Medicine, Children's Hospital of Fudan University, Shanghai, China

4Department of Hematology and Oncology, Children's Hospital of Fudan University, Shanghai, China

5Department of Respiratory Medicine, Children's Hospital of Fudan University, Shanghai, China

6Shanghai Institute of Infectious Disease and Biosecurity, Fudan University, Shanghai, China.

a Zhongqiu Wei, Zhonglin Wang, and Wenjie Ma contributed equally.

b Mei Zeng and Yan Wang contributed equally to this manuscript and are co-corresponding authors.

Correspondence: Mei Zeng, Department of Infectious Disease, Children’s Hospital of Fudan University201102, Shanghai, China. (zengmeigao@aliyun.com)

**List:**

**eTable 1. Questionnaire.**

**eTable 2. Epidemiological and clinical characteristics of the 323 index children and their 951 household members.**

**eFig. 1. Vaccination status of the 323 hospitalized children and their 951 household members.**

**eTable 3. Estimates of the incubation period based on the analysis of 52 cases from 28 households.**

**eTable 4. Estimates of the serial interval based on the analysis of 234 transmission pairs.**

**eTable 1. Questionnaire.**

| **Case initial reporting form - for confirmed cases** | |
| --- | --- |
| **Basic information** |  |
| Case ID |  |
| Case name |  |
| Age (years, months) | years months  Unknown |
| Sex | Male  Female |
| Household size |  |
| Telephone (mobile) number |  |
| Date of first interview (dd/mm/yyyy) | / / |
| Date of follow up (dd/mm/yyyy) | / / |
| **Exposure history** |  |
| Exposure place | Community exposure  Household exposure  Other places: |
| Exposure start date (dd/mm/yyyy) | / / |
| Exposure end date (dd/mm/yyyy) | / / |
| **Vaccination status** |  |
| Vaccination history | Yes  No |
| Manufacture of the vaccines |  |
| Doses of vaccination | Unvaccinated  Partial  Full  Booster |
| Date of the last vaccination (dd/mm/yyyy) | / /  Unknown |
| **Clinical information** |  |
| Date of first positive result of nucleic acid testing or antigen testing (dd/mm/yyyy) | / / |
| Clinical severity | Asymptomatic  Mild  Moderate  Severe  Critical |
| Date of symptom onset (dd/mm/yyyy) | / /  Asymptomatic infection  Unknown |
| Date of admission (dd/mm/yyyy) | / / |
| Date of discharge (dd/mm/yyyy) | / / |
| **Symptoms:** |  |
| Fever (≥37.5°C) or history of fever | Yes  No  Unknown  If Yes, please specify fever spike: °C and fever duration: days |
| Cough | Yes  No  Unknown |
| Nasal obstruction | Yes  No  Unknown |
| Nausea | Yes  No  Unknown |
| Vomiting | Yes  No  Unknown |
| Diarrhoea | Yes  No  Unknown |
| Loss of smell (anosmia) | Yes  No  Unknown |
| Loss of taste | Yes  No  Unknown |
| Muscle aches | Yes  No  Unknown |
| **Underlying disease** |  |
| pre-existing condition/co-morbidity | Yes  No  Unknown  If Yes, please specify: |
| **Imagology and laboratory testing** |  |
| X-ray or CT image characteristics |  |
| White blood cell count (*10^9/L) |  |
| Neutrophil count (*10^9/L) |  |
| Lymphocyte count (*10^9/L) |  |
| Platelet count (*10^9/L) |  |
| C-reactive protein (mg/L) |  |
| **Case initial reporting form - for household contacts** | |
| **Basic information** |  |
| Household Contact ID |  |
| Related hospitalized children |  |
| Relationship with the hospitalized children |  |
| Age (years, months) | 0-17  18+ |
| Sex | Male  Female |
| Telephone (mobile) number |  |
| Date of first interview (dd/mm/yyyy) | / / |
| Date of follow up (dd/mm/yyyy) | / / |
| **Exposure history** |  |
| Exposure place | Community exposure  Household exposure  Other places: |
| Exposure start date (dd/mm/yyyy) | / / |
| Exposure end date (dd/mm/yyyy) | / / |
| **Vaccination status** |  |
| Vaccination history | Yes  No |
| Manufacture of the vaccines |  |
| Doses of vaccination | Unvaccinated  Partial  Full  Booster |
| Date of the last vaccination (dd/mm/yyyy) | / /  Unknown |
| **Clinical information** |  |
| PCR confirmed cases? | Yes  No |
| Date of first positive result of nucleic acid testing or antigen testing (dd/mm/yyyy) | / / |
| Symptomatic cases? | Yes  No |
| Date of symptom onset (dd/mm/yyyy) | / /  Asymptomatic infection  Unknown |
| **Symptoms:** |  |
| Fever (≥37.5°C) or history of fever | Yes  No  Unknown |
| Cough | Yes  No  Unknown |
| Nasal obstruction | Yes  No  Unknown |
| Nausea | Yes  No  Unknown |
| Vomiting | Yes  No  Unknown |
| Diarrhoea | Yes  No  Unknown |
| Loss of smell (anosmia) | Yes  No  Unknown |
| Loss of taste | Yes  No  Unknown |
| Muscle aches | Yes  No  Unknown |

**eTable 2. Epidemiological and clinical characteristics of the 323 index children and their 951 household members.**

| **Characteristics** | **Hospitalized children** | | | **Household members** | |
| --- | --- | --- | --- | --- | --- |
| **Non-pneumonia cases**  **(N=279)** | **Pneumonia cases**  **(N=44)** | **Overall**  **(N=323)** | **Infected**  **(N=787)** | **Uninfected**  **(N=164)** |
| **Age group, years** | n (%) | n (%) | n (%) | n (%) | n (%) |
| Median (IQR) | 2 (0.83-4.08) | 2 (0.98-3.5) | 2 (0.83-4) | - | - |
| **0-17** | **279 (100)** | **44 (100)** | **323 (100)** | **32 (4.07)** | **15 (9.15)** |
| 0-1 | 79 (28.32) | 11 (25) | 90 (27.86) | - | - |
| 1-2 | 97 (34.77) | 15 (34.09) | 112 (34.67) | - | - |
| 3-5 | 48 (17.2) | 14 (31.82) | 62 (19.2) | - | - |
| 6-12 | 44 (15.77) | 3 (6.82) | 47 (14.55) | - | - |
| 13-17 | 11 (3.94) | 1 (2.27) | 12 (3.72) | - | - |
| **18+** | **0 (0)** | **0 (0)** | **0 (0)** | **755 (95.93)** | **149 (90.85)** |
| **Sex** |  |  |  |  |  |
| Male | 168 (60.22) | 26 (59.09) | 194 (60.06) | 313 (39.77) | 101 (61.59) |
| Female | 111 (39.78) | 18 (40.91) | 129 (39.94) | 474 (60.23) | 63 (38.41) |
| **Community exposure** |  |  |  |  |  |
| Yes | 22 (7.89) | 5 (11.36) | 27 (8.36) | 101 (12.83) | 0 (0) |
| No | 190 (68.1) | 32 (72.73) | 222 (68.73) | 501 (63.66) | 0 (0) |
| Not determined | 67 (24.01) | 7 (15.91) | 74 (22.91) | 185 (23.51) | 164 (100) |
| **Vaccination statusa** |  |  |  |  |  |
| Unvaccinated | 241 (86.38) | 41 (93.18) | 282 (87.31) | 186 (23.63) | 21 (12.8) |
| Partial | 7 (2.51) | 0 (0) | 7 (2.17) | 35 (4.45) | 8 (4.88) |
| Full | 31 (11.11) | 3 (6.82) | 34 (10.53) | 332 (42.19) | 75 (45.73) |
| Booster | 0 (0) | 0 (0) | 0 (0) | 233 (29.61) | 60 (36.59) |
| **Underlying disease** |  |  |  |  |  |
| None | 266 (95.34) | 39 (88.64) | 305 (94.43) | - | - |
| Febrile seizures | 6 (2.15) | 2 (4.55) | 8 (2.48) | - | - |
| Solid Tumor | 3 (1.08) | 0 (0) | 3 (0.93) | - | - |
| Congenital heart diseases | 2 (0.72) | 0 (0) | 2 (0.62) |  |  |
| Leukemia | 0 (0) | 1 (2.27) | 1 (0.31) | - |  |
| Rett syndrome | 0 (0) | 1 (2.27) | 1 (0.31) |  | - |
| Crohn’s disease | 1 (0.36) | 0 (0) | 1 (0.31) |  |  |
| Allergic rhinitis | 1 (0.36) | 1 (2.27) | 2 (0.62) | - | - |
| **Clinical severity** |  |  |  |  |  |
| **Symptomatic** | **270 (96.77)** | **44 (100)** | **314(97.21)** | **675 (85.77)** | **-** |
| Mild | 270 (96.77) | 0 (0) | 270 (83.59) | - | - |
| Moderate | 0 (0) | 43 (97.73) | 43 (13.31) | - | - |
| Critical | 0 (0) | 1 (2.27) | 1 (0.31) | - | - |
| **Asymptomatic** | **9 (3.23)** | **0 (0)** | **9 (2.79)** | **112 (14.23)** | **-** |
| **Symptoms** |  |  |  |  |  |
| Fever | 263 (94.27) | 43 (97.73) | 306 (94.74) | - | - |
| Fever spike (℃) | 39.3±0.7 | 39.4±1.1 | 39.3±0.8 | - | - |
| Fever duration (days) | 2 (1-3) | 3 (1-3) | 2 (1-3) | - | - |
| Cough | 107 (38.35) | 25 (56.82) | 132 (40.87) | - | - |
| Nausea/vomiting/  diarrhea | 42 (15.05) | 11 (25) | 53 (16.41) | - | - |
| Stuffy nose | 27 (9.68) | 5 (11.36) | 32 (9.91) | - | - |
| Sore throat | 15 (5.38) | 4 (9.09) | 19 (5.88) | - | - |
| Loss of taste/smelling | 3 (1.08) | 1 (2.27) | 4 (1.24) | - | - |

aPartial vaccination was defined as an individual receiving only one-dose inactivated vaccine. Full vaccination was defined as an individual receiving two doses of inactivated SARS-CoV-2 vaccines for at least 2 weeks. Booster vaccination was defined as a fully vaccinated individual receiving an additional dose of inactivated vaccine for at least 14 days.

**
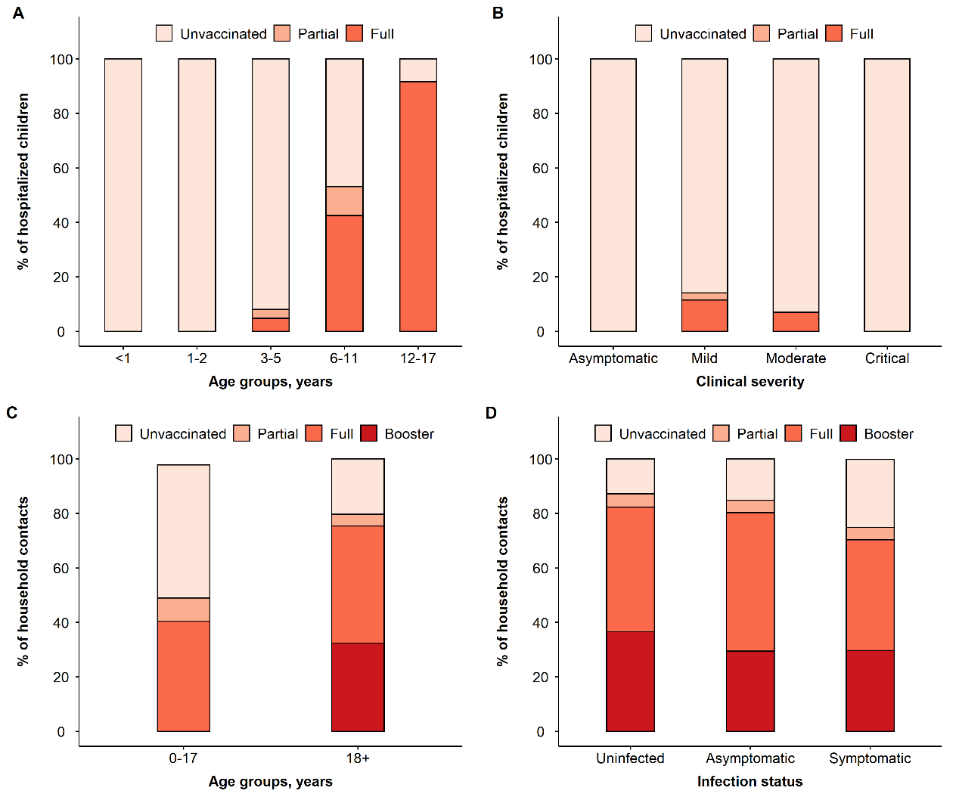
**

**eFig. 1. Vaccination status of the 323 hospitalized children and their 951 household members. (A).** Vaccination status of the 323 hospitalized children by age. **(B).** Vaccination status of the 323 hospitalized children by clinical severity. **(C).** Vaccination status of the 951 household members by age. **(D).** Vaccination status of the 951 household members by infection status.

**eTable 3. Estimates of the incubation period based on the analysis of 52 cases from 28 households.**

| **Distribution** | **Parameters**  **[mean (SD)]** | **Mean**  **(days)** | **Quantiles**  **(0.025-0.975, days)** | **AIC** |
| --- | --- | --- | --- | --- |
| Gamma | Shape = 3.93 (1.20);  Rate =0.84 (0.29) | 4.67 | 1.25-10.3 | 84.53 |
| Weibull | Shape = 2.36 (0.43)  Scale = 5.19 (0.48) | 4.60 | 1.10-9.03 | 84.14 |
| Lognormal | Meanlog = 1.42 (0.11)  Sdlog = 0.57 (0.10) | 4.87 | 1.36-12.62 | 85.62 |

**eTable 4. Estimates of the serial interval based on the analysis of 234 transmission pairs.**

| **Distribution** | **Parametersa**  **[mean (SD)]** | **Mean**  **(days)** | **Quantiles**  **(0.025-0.975, days)** | **AIC** |
| --- | --- | --- | --- | --- |
| Gamma | Shape = 17.01 (0.17);  Rate =1.17 (0.01) | 4.10 | -1.99-11.81 | 106000.4 |
| Weibull | Shape = 4.46 (0.02)  Scale = 15.75 (0.03) | 3.87 | -3.58-10.61 | 104592.4 |
| Lognormal | Meanlog = 2.65 (0.002)  Sdlog = 0.30 (0.002) | 4.34 | -2.68-15.19 | 114545.3 |

a we fitted the distribution with a shift parameter equals to 10.5 days allowing negative serial intervals
